# Supplementary material for: Chest pain syndromes are associated with high rates of recidivism and costs in young United States Veterans
Source: PubMed Central journal article supplement (PMC4511555; doi:10.1186/s12875-015-0287-9), 2015-07-23
Supplement: 12875_2015_287_MOESM1_ESM.pdf [file 12875_2015_287_MOESM1_ESM.pdf]

## Appendix

### ICD-9 Codes for CAD

|            |                                                |
|------------|------------------------------------------------|
| <b>410</b> | <b>Acute MI</b>                                |
| 410.0      | Of anterolateral wall                          |
| 410.00     | Of Anterolateral wall – episode of care unspec |
| 410.01     | Of ant wall – initial ep of care               |
| 410.02     | Of ant wall – subsequent episode               |
| 410.1      | Of other anterior wall                         |
| 410.10     | Episode of care unspecified                    |
| 410.11     | Initial episode of care                        |
| 410.12     | Subsequent episode of care                     |
| 410.2      | Of inferolateral wall                          |
| 410.20     | Episode of care unspecified                    |
| 410.21     | Initial episode of care                        |
| 410.22     | Subsequent episode of care                     |

|        |                                |
|--------|--------------------------------|
| 410.3  | Of inferoposterior wall        |
| 410.30 | Episode of care unspecified    |
| 410.31 | Initial episode of care        |
| 410.32 | Subsequent episode of care     |
| 410.4  | Of other inferior wall         |
| 410.40 | Episode of care unspecified    |
| 410.41 | Initial episode of care        |
| 410.42 | Subsequent episode of care     |
| 410.5  | Of other lateral wall          |
| 410.50 | Episode of care unspecified    |
| 410.51 | Initial episode of care        |
| 410.52 | Subsequent episode of care     |
| 410.6  | True posterior wall infarction |

|        |                             |
|--------|-----------------------------|
| 410.60 | Episode of care unspecified |
| 410.61 | Initial episode of care     |
| 410.62 | Subsequent episode of care  |
| 410.7  | Subendocardial infarction   |
| 410.70 | Episode of care unspecified |
| 410.71 | Initial episode of care     |
| 410.72 | Subsequent episode of care  |
| 410.8  | Of other specified sites    |
| 410.80 | Episode of care unspecified |
| 410.81 | Initial episode of care     |
| 410.82 | Subsequent episode of care  |
| 410.9  | Unspecified site            |
| 410.90 | Episode of care unspecified |
| 410.91 | Initial episode of care     |

|        |                                                          |
|--------|----------------------------------------------------------|
| 410.92 | Subsequent episode of care                               |
| 411    | Acute and subacute forms of ischemic heart disease       |
| 411.0  | Postmyocardial infarction syndrome                       |
| 411.1  | Intermediate coronary syndrome                           |
| 411.8  | Other acute and subacute forms of ischemic heart disease |
| 411.81 | Coronary occlusion without mi                            |
| 411.89 | Other                                                    |
| 412    | Old myocardial infarction                                |
| 413    | Angina pectoris                                          |
| 413.0  | Angina decubitus                                         |
| 413.1  | Prinzmetal angina                                        |
| 413.9  | Other and unspecified angina pectoris                    |

|        |                                                |
|--------|------------------------------------------------|
| 414    | Other forms of chronic ischemic heart disease  |
| 414.0  | Coronary atherosclerosis                       |
| 414.00 | Of unspecified type of vessel, native or graft |

|        |                                                         |
|--------|---------------------------------------------------------|
| 414.01 | Of native coronary artery                               |
| 414.8  | Other specified forms of chronic ischemic heart disease |
| 414.9  | Chronic ischemic heart disease unspecified              |

|        |                                                                     |
|--------|---------------------------------------------------------------------|
| 429.7  | Certain sequelae of myocardial infarction, not elsewhere classified |
| V45.81 | Aortocoronary bypass status                                         |

|        |                                                       |
|--------|-------------------------------------------------------|
| V45.82 | Percutaneous transluminal coronary angioplasty status |
|--------|-------------------------------------------------------|
